# Supplementary material for: Subauroral Crosstalk in POES/Metop TED proton channels
Source: Copernicus journal article supplement (doi:10.5194/angeo-2023-33), 2023-11-09

Particle flux at 60° and 160° mag. longitude FF (year 2013, Kp<=0.7)

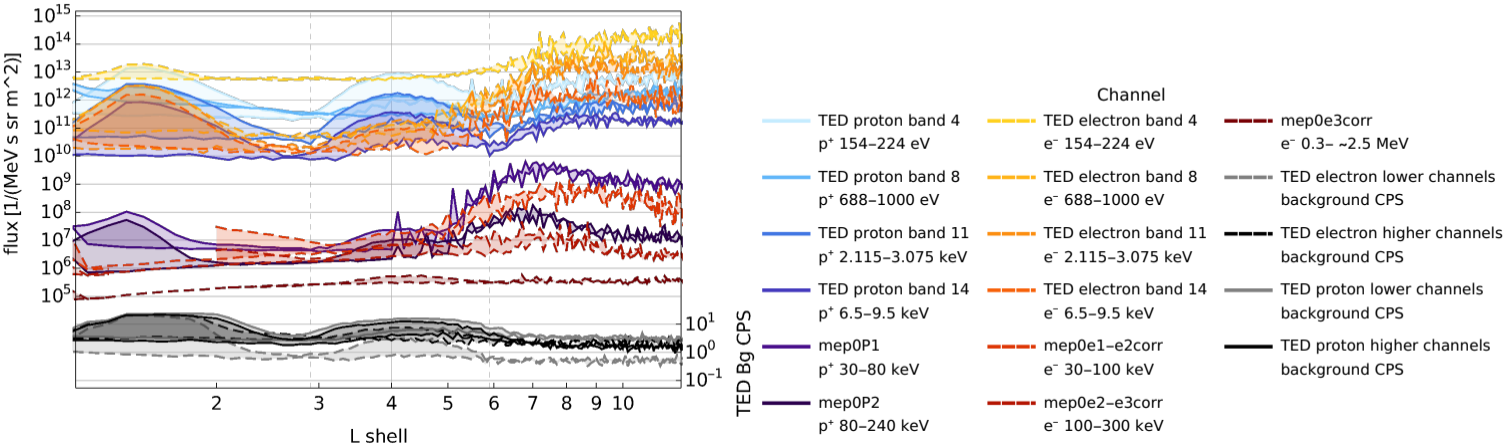

Supplement: Supplementary file [file angeo-2023-33-CC1-supplement.pdf]
